# Supplementary material
Source: PubMed Central journal article supplement (PMC9437004)
Supplement: 41431_2022_1137_MOESM4_ESM.pdf [file 41431_2022_1137_MOESM4_ESM.pdf]

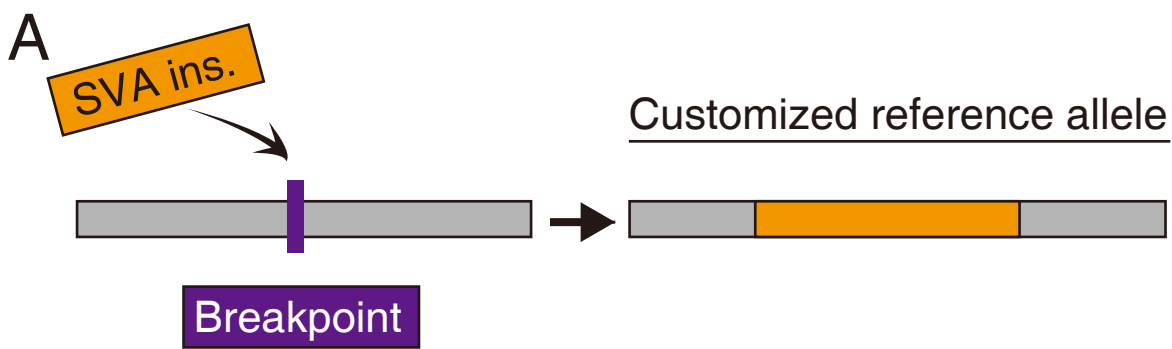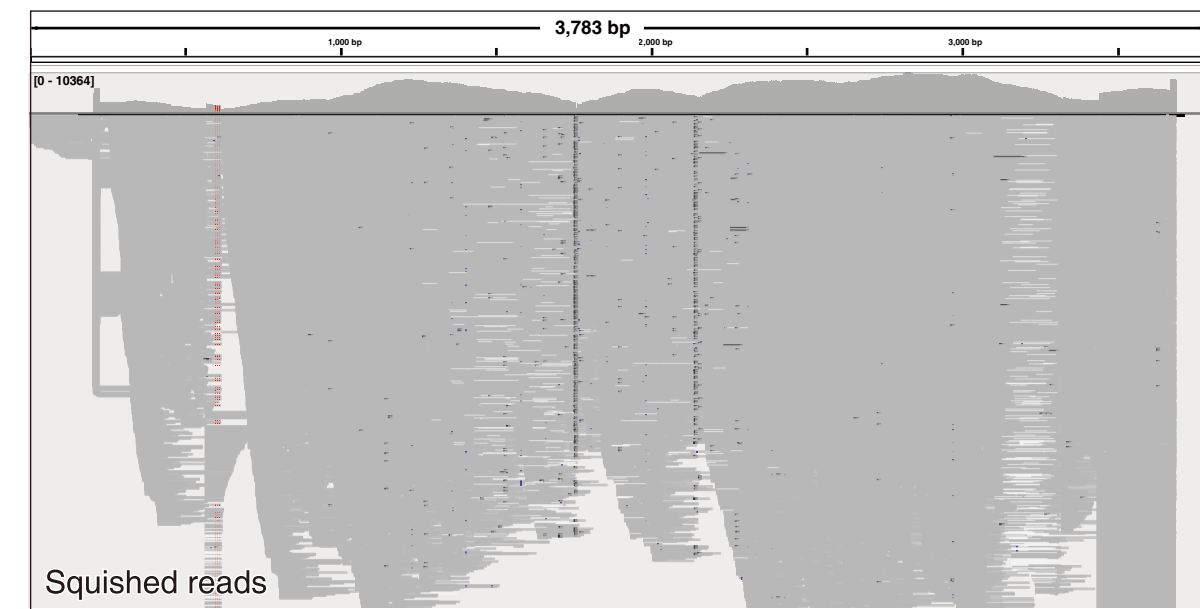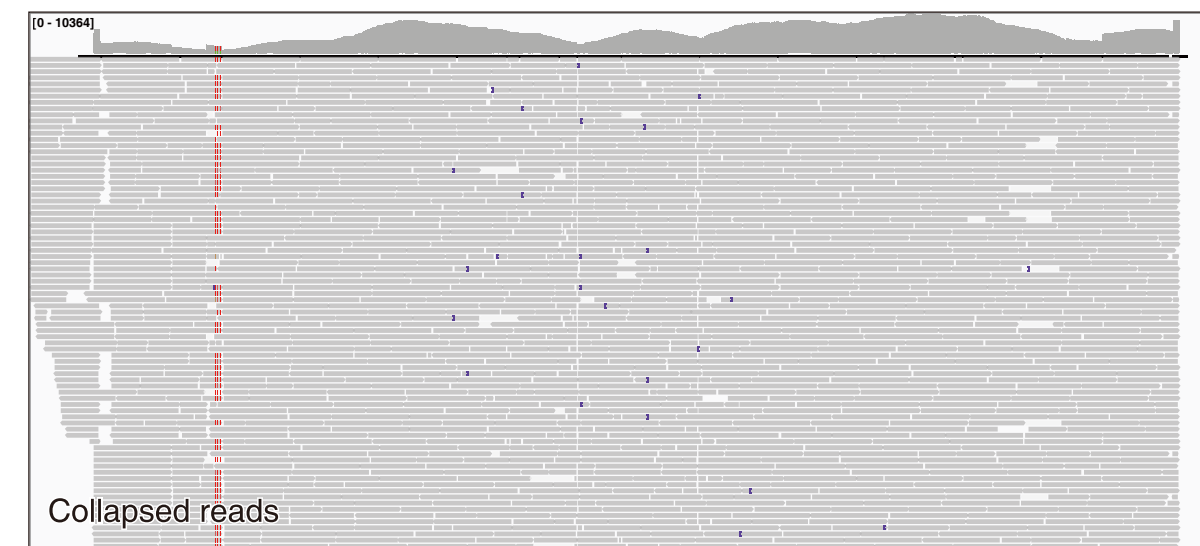

**B** An alternative CCCTCT hexameric repeats  $((CCCTCT)_2 CCCGTCT)_n$

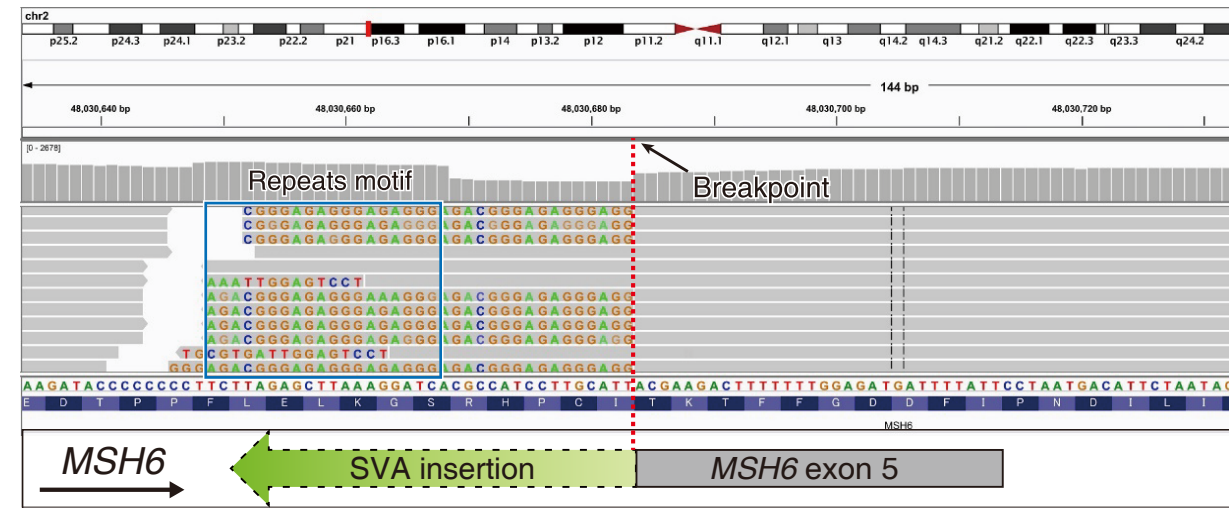

Yamamoto, G. *et al.* antisense exonic SVA insertion

Reverse complementary sequence  $(AGACGGG(AGAGGG)_2)_n$

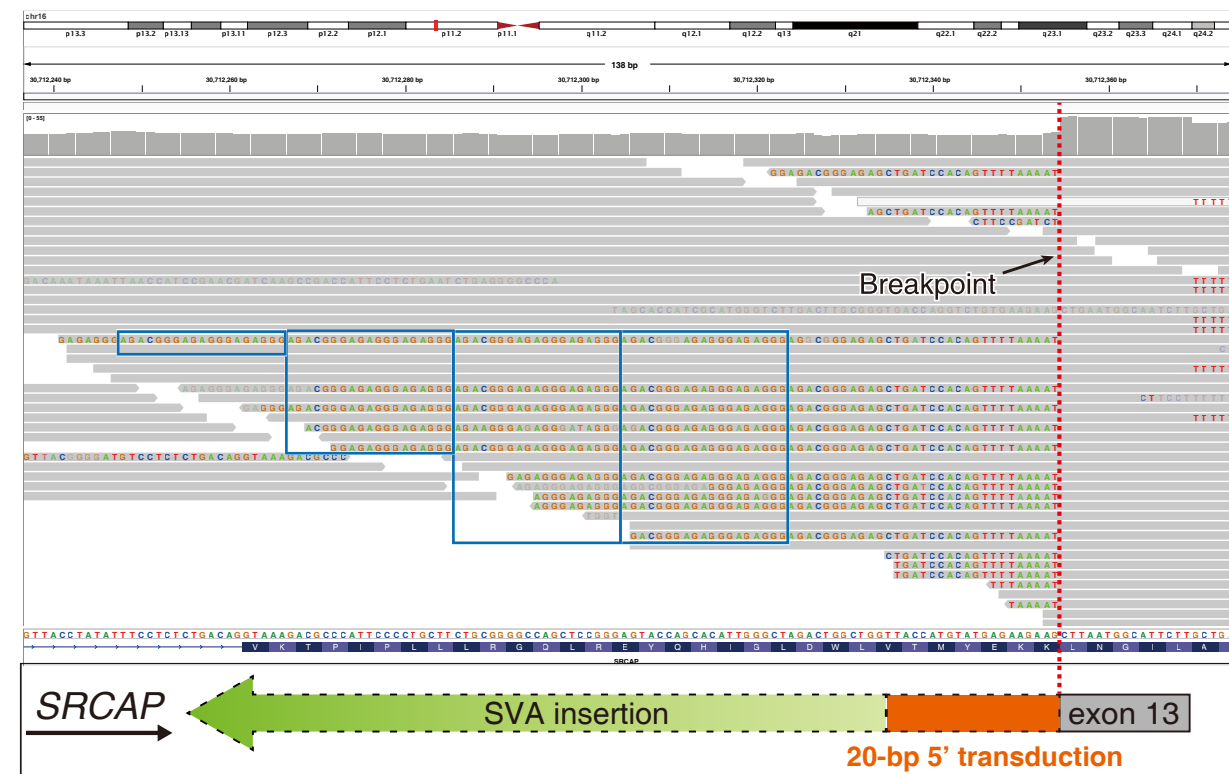

Antisense exonic SVA insertion in this study
