# Supplementary material
Source: PubMed Central journal article supplement (PMC9437004)

### 3' junction PCR

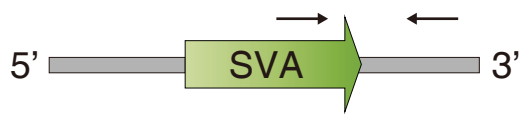

Proband  
Mother  
Father  
Control

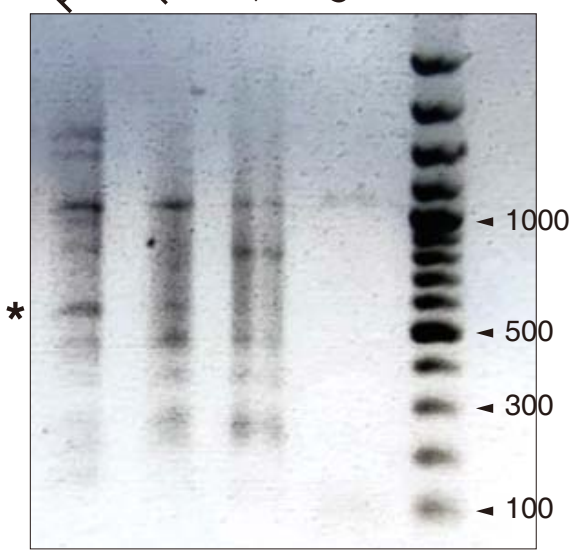

Supplement: 41431_2022_1137_MOESM3_ESM.pdf [file 41431_2022_1137_MOESM3_ESM.pdf]
